# Supplementary material
Source: publisher site journal article supplement (https://www.dovepress.com/article/143557)
Supplement: Supplementary file 1 [file get_supplementary_file.php]

## **Repeated intermittent ulipristal acetate in the treatment of uterine fibroids: a cost-effectiveness analysis**

### **Supplementary material**

Kirk Geale<sup>1,2</sup>, Ertan Saridogan<sup>3</sup>, Matthieu Lehmann<sup>4</sup>, Pablo Arriagada<sup>4</sup>, Marcus Hultberg<sup>2</sup>, Martin Henriksson<sup>5</sup>

<sup>1</sup>Department of Public Health and Clinical Medicine, Dermatology, Umeå University, Umeå, Sweden; <sup>2</sup>PAREXEL International, Stockholm, Sweden; <sup>3</sup>University College London Hospital, Women's Health Division, London, United Kingdom, <sup>4</sup>PregLem SA, Geneva, Switzerland, <sup>5</sup>Department of Medical and Health Sciences, Linköping University, Linköping, Sweden

Correspondence: Kirk Geale, Department of Public Health and Clinical Medicine, Umeå University, Umeå, Sweden

Tel: +46 (0) 72 509 4369, Email: [kirk.geale@umu.se](mailto:kirk.geale@umu.se)

## Quality of life decrements

Table 1: UPA short-term adverse event risk, quality of life decrements, and cost

|                                               | Monthly risk of AE <sup>1</sup> | Quality of life decrement | Cost (£) | Cost source                               |
|-----------------------------------------------|---------------------------------|---------------------------|----------|-------------------------------------------|
| <b>Acne</b>                                   | 0.15%                           | -0.062 <sup>2</sup>       | 45.23    | 1 GP visit and Dalacin T <sup>3;4</sup>   |
| <b>Anaemia</b>                                | 0.13%                           | -0.110 <sup>5</sup>       | 1375.14  | SA04K <sup>6</sup>                        |
| <b>Anxiety</b>                                | 0.13%                           | -0.161 <sup>7</sup>       | 181.89   | AB11Z <sup>6</sup>                        |
| <b>Fatigue</b>                                | 0.18%                           | -0.115 <sup>8</sup>       | 0.00     | Assume no cost                            |
| <b>Headache</b>                               | 1.27%                           | 0 (Assumption)            | 0.00     | Assume no cost                            |
| <b>Hot flushes</b>                            | 0.72%                           | -0.060 <sup>9</sup>       | 38.00    | 1 GP visit <sup>4</sup>                   |
| <b>Hypertension</b>                           | 0.11%                           | 0 (Assumption)            | 759.13   | EB04Z <sup>6</sup>                        |
| <b>Increase creatine phosphokinase</b>        | 0.13%                           | 0 (Assumption)            | 0.00     | Assume no cost                            |
| <b>Influenza</b>                              | 0.29%                           | -0.010 <sup>10</sup>      | 53.41    | 1 GP visit and oseltamivir <sup>3;4</sup> |
| <b>Nasopharyngitis</b>                        | 0.20%                           | -0.010 <sup>10</sup>      | 53.41    | Assume influenza                          |
| <b>Nausea</b>                                 | 0.20%                           | -0.130 <sup>8</sup>       | 0.97     | Metoclopramide <sup>3</sup>               |
| <b>Pain (breast, pelvic, abdominal, back)</b> | 0.85%                           | -0.014 <sup>11</sup>      | 468.37   | FZ90B <sup>6</sup>                        |
| <b>Vaginal discharge</b>                      | 0.18%                           | 0 (Assumption)            | 0.00     | Assume no cost                            |
| <b>Vertigo</b>                                | 0.15%                           | -0.130 <sup>8</sup>       | 42.26    | 1 GP visit and Cinnarizine <sup>3;4</sup> |
| <b>Weight gain</b>                            | 0.11%                           | -0.099 <sup>12</sup>      | 0.00     | Assume no cost                            |

Supplementary material

**Table 2: BSC short-term adverse event risk, quality of life decrements, and cost**

|                                   | <b>Monthly risk of AE<sup>13</sup></b> | <b>Quality of life decrement</b>        | <b>Cost (£)</b> | <b>Cost source</b> |
|-----------------------------------|----------------------------------------|-----------------------------------------|-----------------|--------------------|
| <b>Headache</b>                   | 1.06%                                  | 0 (Assumption)                          | 0.00            | Assume no cost     |
| <b>Pain, discomfort, or aches</b> | 2.71%                                  | -0.060 <sup>9</sup>                     | 468.37          | FZ90B <sup>6</sup> |
| <b>Pyrexia</b>                    | 1.06%                                  | -0.010 <sup>10</sup> (Assume influenza) | 0.00            | Assume no cost     |

**Table 3: Surgery short-term adverse event risk, quality of life decrements, and cost**

|                                               | Risk of adverse event per surgical procedure |                  |                  |                         |                   | Quality of life decrement                   | Cost (£) | Cost source             |
|-----------------------------------------------|----------------------------------------------|------------------|------------------|-------------------------|-------------------|---------------------------------------------|----------|-------------------------|
|                                               | AH <sup>14</sup>                             | LH <sup>14</sup> | VH <sup>14</sup> | Myo (all) <sup>15</sup> | UAE <sup>15</sup> |                                             |          |                         |
| <b>Bowel obstruction</b>                      |                                              |                  |                  | 1.37%                   |                   | -0.200 <sup>16</sup>                        | 797.80   | FZ51Z <sup>6</sup>      |
| <b>Febrile event</b>                          | 2.50%                                        | 1.40%            | 0.90%            |                         |                   | 0 (Assumption)                              | 0.00     | Assume no cost          |
| <b>Fibroid expulsion</b>                      |                                              |                  |                  |                         | 1.35%             | -0.014 <sup>11</sup> (Assume pain)          | 19.10    | MA31Z <sup>6</sup>      |
| <b>Groin haematoma</b>                        |                                              |                  |                  |                         | 2.70%             | 0 (Assumption)                              | 0.00     | Assume no cost          |
| <b>Haemorrhage</b>                            | 8.30%                                        | 5.70%            | 4.40%            | 1.37%                   |                   | -0.198 <sup>17</sup>                        | 451.10   | FZ38P <sup>6</sup>      |
| <b>Ileus</b>                                  |                                              |                  |                  | 1.37%                   |                   | -0.200 <sup>16</sup>                        | 38.00    | 1 GP visit <sup>3</sup> |
| <b>Pelvic infection, haematoma or abscess</b> | 0.80%                                        | 3.20%            | 2.20%            |                         |                   | -0.195 <sup>18</sup>                        | 452.00   | WA09C <sup>6</sup>      |
| <b>Pneumonia</b>                              |                                              |                  |                  | 1.37%                   |                   | -0.010 <sup>10</sup> (Assume influenza)     | 366.19   | SA04L <sup>6</sup>      |
| <b>Post embolization syndrome</b>             |                                              |                  |                  |                         | 8.11%             | -0.144 <sup>8;11</sup> (Assume pain+nausea) | 469.34   | Assume pain plus nausea |
| <b>Pulmonary embolus</b>                      |                                              |                  |                  | 1.37%                   |                   | -0.018 <sup>19</sup>                        | 235.47   | DZ09F <sup>6</sup>      |
| <b>Sepsis</b>                                 |                                              |                  |                  | 1.37%                   | 1.35%             | -0.120 <sup>20</sup>                        | 1 851.98 | WA03C <sup>6</sup>      |
| <b>UTI</b>                                    | 2.20%                                        | 0.70%            | 1.50%            | 10.96%                  |                   | -0.070 <sup>21</sup>                        | 430.00   | LA04S <sup>6</sup>      |
| <b>Urticaria</b>                              |                                              |                  |                  |                         | 1%                | 0 (Assumption)                              | 0.00     | Assume no cost          |
| <b>Wound infection</b>                        | 2.40%                                        | 1.50%            | 0.90%            |                         |                   | -0.195 <sup>18</sup>                        | 452.00   | WA09C <sup>6</sup>      |

AH: Abdominal hysterectomy; LH: Laparoscopic hysterectomy; VH: Vaginal hysterectomy; Myo: Myomectomy; UAE: Uterine artery embolisation

**Table 4: Quality of life decrements due to persistent complications (following hysterectomy)**

|                                        | <b>Quality of life decrement</b> | <b>Comment</b>                 |
|----------------------------------------|----------------------------------|--------------------------------|
| <b>Pain</b>                            | -0.014 <sup>11</sup>             | Assuming abdominal pain        |
| <b>Hot flushes</b>                     | -0.060 <sup>9</sup>              |                                |
| <b>Fatigue</b>                         | -0.115 <sup>8</sup>              |                                |
| <b>Urinary problems</b>                | -0.070 <sup>21</sup>             | Assume urinary tract infection |
| <b>Abdominal distention</b>            | -0.090 <sup>22</sup>             | Assume dyspepsia               |
| <b>Insomnia</b>                        | -0.115 <sup>8</sup>              | Assume fatigue                 |
| <b>Housework problems</b>              | -0.065 <sup>23</sup>             |                                |
| <b>Anxiety</b>                         | -0.161 <sup>7</sup>              |                                |
| <b>Vaginal irritation and pruritus</b> | -0.014 <sup>11</sup>             | Assuming pain                  |

### Extrapolation of pain and bleeding

In PEARL I and IV, pain and bleeding were measured at fixed intervals, and were extrapolated according to the following methods: In the BSC arm, the model imputes values between bleeding and pain observations by assuming a linear relationship until the last observation, where all following dates are assumed to be equal to the last observation. Similarly for pain in the UPA arm, a linear relationship between the observations was used. Bleeding imputation for UPA differed from that of BSC due to the timing of observations, which occurred one month into the treatment break. Following that observation, it was estimated from trial data that PBAC increased by 50 from the end of the first month of treatment break to the second, when UPA treatment was reinitiated. Using PBAC at the initiation date as a reference, trial data for UPA in PEARL I and II were used to measure the percentage decrease in bleeding in each month on active treatment.

Phase II refers to the long term treatment pattern where the treatment break was extended to six months.

**Figure 1: UPA PBAC pattern including extrapolation**

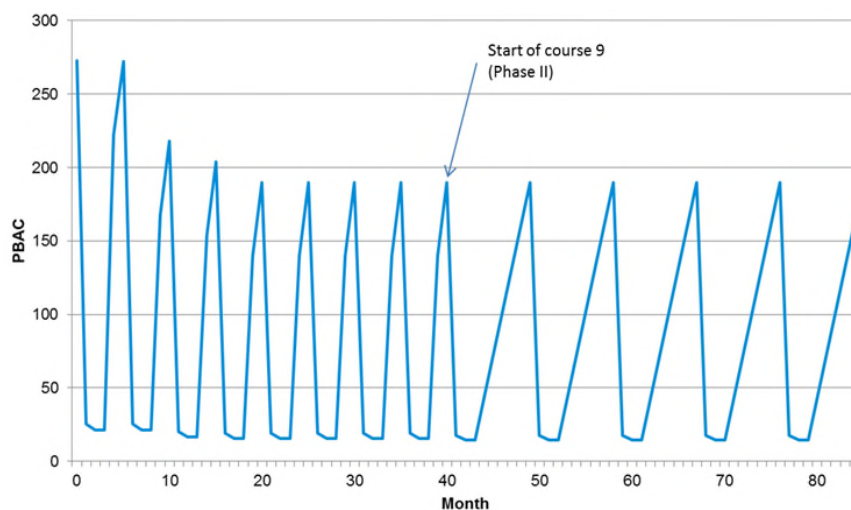

**Figure 2: UPA VAS pattern, including extrapolation**

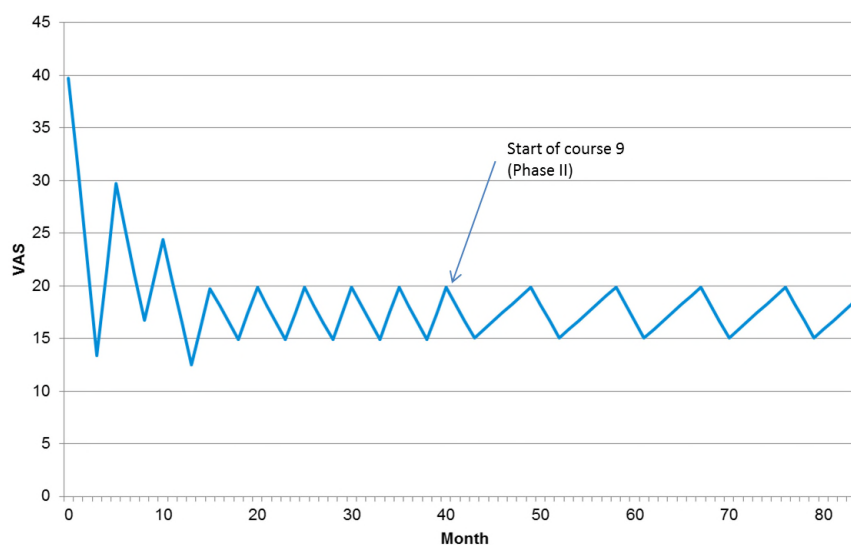

#### **Calculation of BSC withdrawal rate to surgery**

The calculation of withdrawals to surgery from BSC was based on patients included in the observational PREMYA study<sup>24,25</sup>. There were 1139 patients that received no treatment, iron supplements, or NSAIDs prior to beginning PREMYA, corresponding to the BSC patient group. Of these patients, 142 received a uterine fibroid related surgery before the start of PREMYA. The average time between previous diagnosis of the 1139 patients and the beginning of PREMYA was 26.6 months, which is interpreted as the average time at risk of all 1139 patients. The percentage of patients receiving a surgery following a uterine fibroid diagnosis was calculated as 142 divided by 1139, equal to 12.5%. This risk was converted from 26.6 months to an annual risk assuming constant rates of surgery over time<sup>26</sup>, to give the withdrawal rate for patients treated with BSC to surgery, equal to 5.83%.

#### **Calculation of UPA withdrawal rate to surgery**

The cumulative UPA bleeding levels during course four were divided by the cumulative bleeding while on treatment with BSC during the same time period. The resulting calculation shows that UPA patients bled at a rate of 40.8% of BSC patients, and therefore it was assumed that UPA patients withdraw to surgery at a rate equal to 40.8% of BSC patients following course 4.

Probabilistic sensitivity analysis

Table 5: Distributions used for major parameter categories

| Variable characteristic                     | Distribution used | Reason                                    |
|---------------------------------------------|-------------------|-------------------------------------------|
| Cost                                        | Gamma             | Positive, bounded at 0                    |
| Utility                                     | Beta              | Bounded between 0 and 1                   |
| Disutility                                  | Negative gamma    | Bounded between $-\infty$ and 0           |
| Risk                                        | Beta              | Bounded between 0 and 1                   |
| Proportion not relative to other parameters | Beta              | Bounded between 0 and 1                   |
| Proportion relative to other parameters     | Dirichlet         | Draws must sum to given value (i.e. 100%) |
| Duration                                    | Gamma             | Positive, bounded at 0                    |
| Resource usage                              | Gamma             | Positive, bounded at 0                    |

Figure 3: Probability that UPA is cost-effective given increasing willingness to pay for a QALY

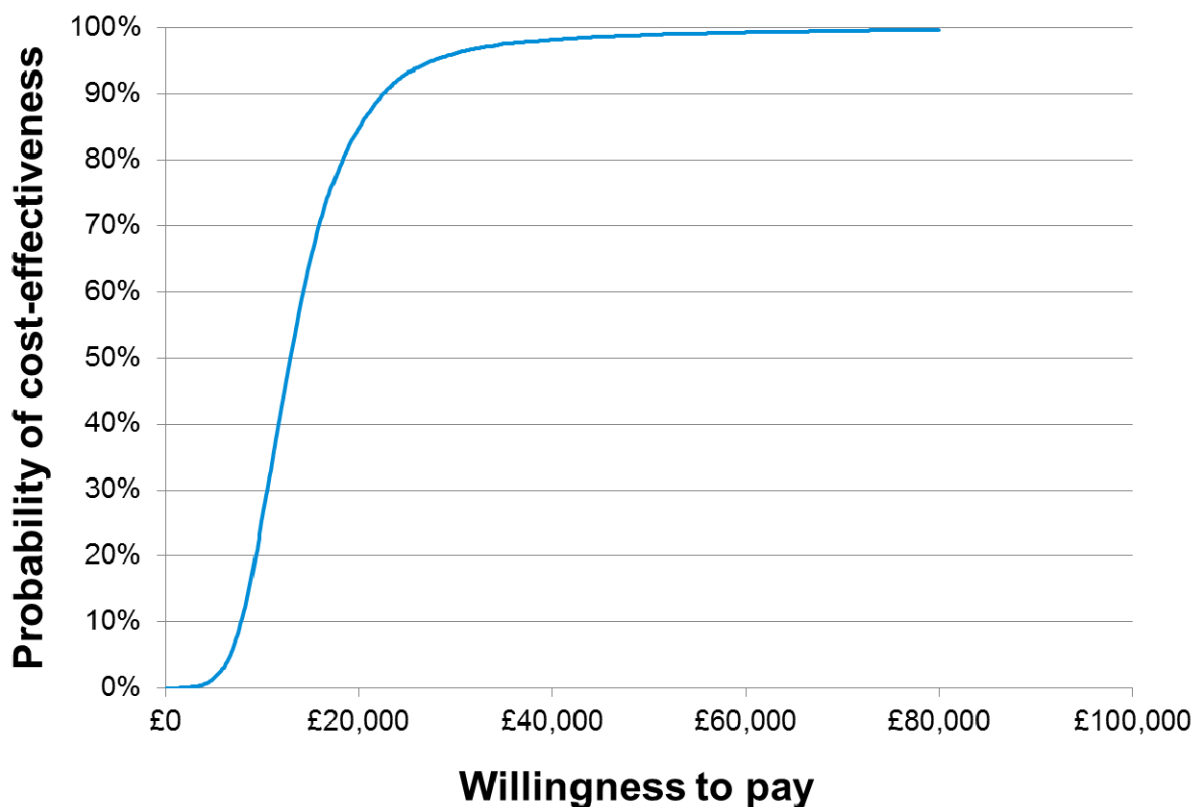



### Deterministic sensitivity analysis (DSA)

In order to address the model's sensitivity to each parameter, the model's parameters are varied individually by +/- 10%. The results are presented in the form of a tornado diagram where the ten parameters with the largest influence on the ICER are included.

The results of the DSA should be interpreted in the context of the methodology of used – that is, each input parameter is varied individually. Changing a parameters value by 10% increases or decreases the ICER by a certain amount, showing the model's sensitivity to this parameter. It is not always clear whether a 10% change is realistic, and therefore the DSA may not always result in a realistic change in the ICER.

**Figure 4: Deterministic sensitivity analysis (DSA): +/-10% parameter variation**

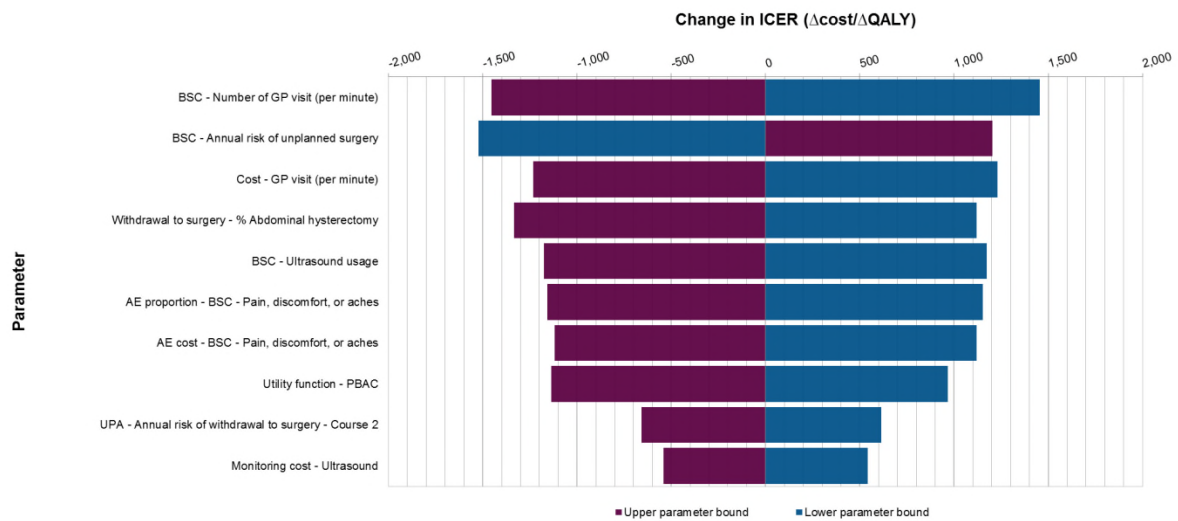

## Reference List

- (1) PregLem. PEARL IV: PGL11-006. Data on file. 2015.
- (2) Chen SC, Bayoumi AM, Soon SL, Aftergut K, Cruz P, Sexton SA et al. A catalog of dermatology utilities: a measure of the burden of skin diseases. *Journal of Investigative Dermatology Symposium Proceedings* 2004; 9(2):160-168.
- (3) BNF. British National Formulary February 2015. <http://www.evidence.nhs.uk/formulary/> . 2015. 2014.
- (4) PSSRU. Unit costs of Health & social care 2014. <http://www.pssru.ac.uk/project-pages/unit-costs/2014/> . 2014. 2015.
- (5) Del Rio RA, Post AB, Singer ME. Cost–effectiveness of hematologic growth factors for anemia occurring during hepatitis C combination therapy. *Hepatology* 2006; 44(6):1598-1606.
- (6) NHS. Reference Cost Collection: National Schedule of Reference Costs - Year 2013-14 - NHS trusts and NHS foundation trusts. <https://www.gov.uk/government/publications/nhs-reference-costs-2013-to-2014> . 22-1-2015. 2015.
- (7) Stein MB, Roy-Byrne PP, Craske MG, Bystritsky A, Sullivan G, Pyne JM et al. Functional impact and health utility of anxiety disorders in primary care outpatients. *Medical care* 2005; 43(12):1164-1170.
- (8) Lloyd A, Nafees B, Narewska J, Dewilde S, Watkins J. Health state utilities for metastatic breast cancer. *British journal of cancer* 2006; 95(6):683-690.
- (9) Hux M, Ng C, Ortega GL, Ferrazzi S, Goeree R. Utility values for pre-menopausal women suffering from symptomatic uterine fibroids. *Expert review of pharmacoeconomics & outcomes research* 2014;(0):1-9.
- (10) Jit M, Cromer D, Baguelin M, Stowe J, Andrews N, Miller E. The cost-effectiveness of vaccinating pregnant women against seasonal influenza in England and Wales. *Vaccine* 2010; 29(1):115-122.
- (11) Anderson JP, Moser RJ. Parasite screening and treatment among Indochinese refugees: cost-benefit/utility and the General Health Policy Model. *JAMA* 1985; 253(15):2229-2235.
- (12) Sach TH, Barton GR, Doherty M, Muir KR, Jenkinson C, Avery AJ. The relationship between body mass index and health-related quality of life: comparing the EQ-5D, EuroQol VAS and SF-6D. *International journal of obesity* 2007; 31(1):189-196.
- (13) Donnez J, Tatarchuk TF, Bouchard P, Puscasiu L, Zakharenko NF, Ivanova T et al. Ulipristal acetate versus placebo for fibroid treatment before surgery. *N Engl J Med* 2012; 366(5):409-420.

## Supplementary material

- (14) Brummer TH, Jyrki Jalkanen, Jaana Fraser, Anna-Mari Heikkinen, Minna Kauko, Juha Mäkinen et al. FINHYST, a prospective study of 5279 hysterectomies: complications and their risk factors. *Human reproduction* 2011; 26(7):1741-1751.
- (15) Manyonda IT, Bratby M, Horst JS, Banu N, Gorti M, Belli AM. Uterine artery embolization versus myomectomy: impact on quality of life results of the FUME (Fibroids of the Uterus: Myomectomy versus Embolization) Trial. *Cardiovascular and interventional radiology* 2012; 35(3):530-536.
- (16) Earnshaw SR, Klok RM, Iyer S, McDade C. Methylalnaltrexone bromide for the treatment of opioid-induced constipation in patients with advanced illness: cost-effectiveness analysis. *Alimentary pharmacology & therapeutics* 2010; 31(8):911-921.
- (17) Freeman JV, Zhu RP, Owens DK, Garber AM, Hutton DW, Go AS et al. Cost-effectiveness of dabigatran compared with warfarin for stroke prevention in atrial fibrillation. *Annals of internal medicine* 2011; 154(1):1-11.
- (18) Tolley K, Goad C, Yi Y, Maroudas P, Haiderali A, Thompson G. Utility elicitation study in the UK general public for late-stage chronic lymphocytic leukaemia. *The European Journal of Health Economics* 2013; 14(5):749-759.
- (19) Blondon M, Perrier A, Nendaz M, Righini M, Boehlen F, Boulvain M et al. Thromboprophylaxis with low-molecular-weight heparin after cesarean delivery. *Thrombosis & Haemostasis* 2010; 19(1):129.
- (20) Karlsson S, Ruokonen E, Varpula T, Ala-Kokko TI, Pettilä V, Finnsepsis Study Group. Long-term outcome and quality-adjusted life years after severe sepsis\*. *Critical care medicine* 2009; 37(4):1268-1274.
- (21) Armstrong N, Vale L, Deverill M, Nabi G, McClinton S, NİÇÖDow J et al. Surgical treatments for men with benign prostatic enlargement: cost effectiveness study. *BMJ* 2009; 338.
- (22) Groeneveld PW, Lieu TA, Fendrick AM, Hurley LB, Ackerson LM, Levin TR et al. Quality of life measurement clarifies the cost-effectiveness of *Helicobacter pylori* eradication in peptic ulcer disease and uninvestigated dyspepsia. *The American journal of gastroenterology* 2001; 96(2):338-347.
- (23) Dolan P. Modeling valuations for EuroQol health states. *Medical care* 1997; 35(11):1095-1108.
- (24) PregLem SA. PREMYA observational study. 2015.
- (25) Fernandez H, Schmidt T, Powell M, Costa APcF, Arriagada P, Thaler C. Real world data of 1473 patients treated with ulipristal acetate for uterine fibroids: Premya study results. *European Journal of Obstetrics & Gynecology and Reproductive Biology* 2017;208:91-6
- (26) Fleurence RL, Hollenbeak CS. Rates and probabilities in economic modelling: transformation, translation and appropriate application. *Pharmacoeconomics* 2007; 25(1):3-6.
